# Supplementary material for: Genome-enabled predictions for fruit weight and quality from repeated records in European peach progenies
Source: PubMed Central journal article supplement (PMC5460546; doi:10.1186/s12864-017-3781-8), 2017-06-06
Supplement: 12864_2017_3781_MOESM4_ESM.pdf [file 12864_2017_3781_MOESM4_ESM.pdf]

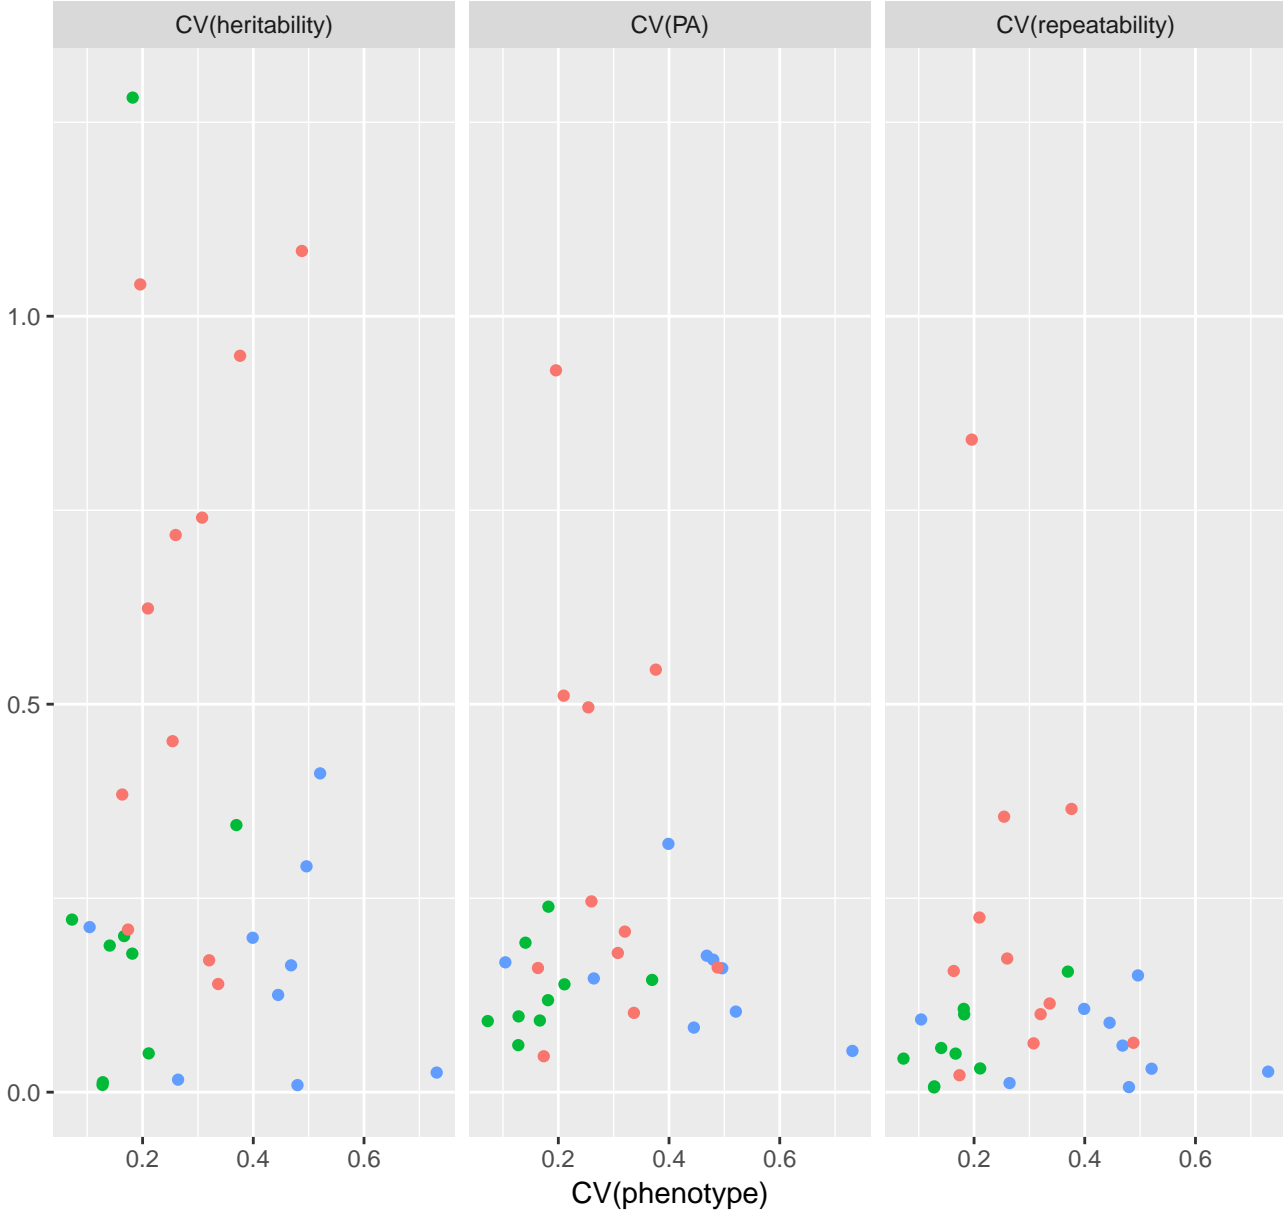

● Fruit weight (g)
 ● Sugar content (Brix deg)
 ● Titratable acidity (meq/100ml)
